# Supplementary material for: Identification of Novel Natural Products as Effective and Broad-Spectrum Anti-Zika Virus Inhibitors
Source: Viruses. 2019 Nov 2;11(11):1019. doi: 10.3390/v11111019 (PMC6893700; doi:10.3390/v11111019)
Supplement: Supplementary file 1 [file viruses-11-01019-s001.pdf]

## Supplementary materials

Figure S1

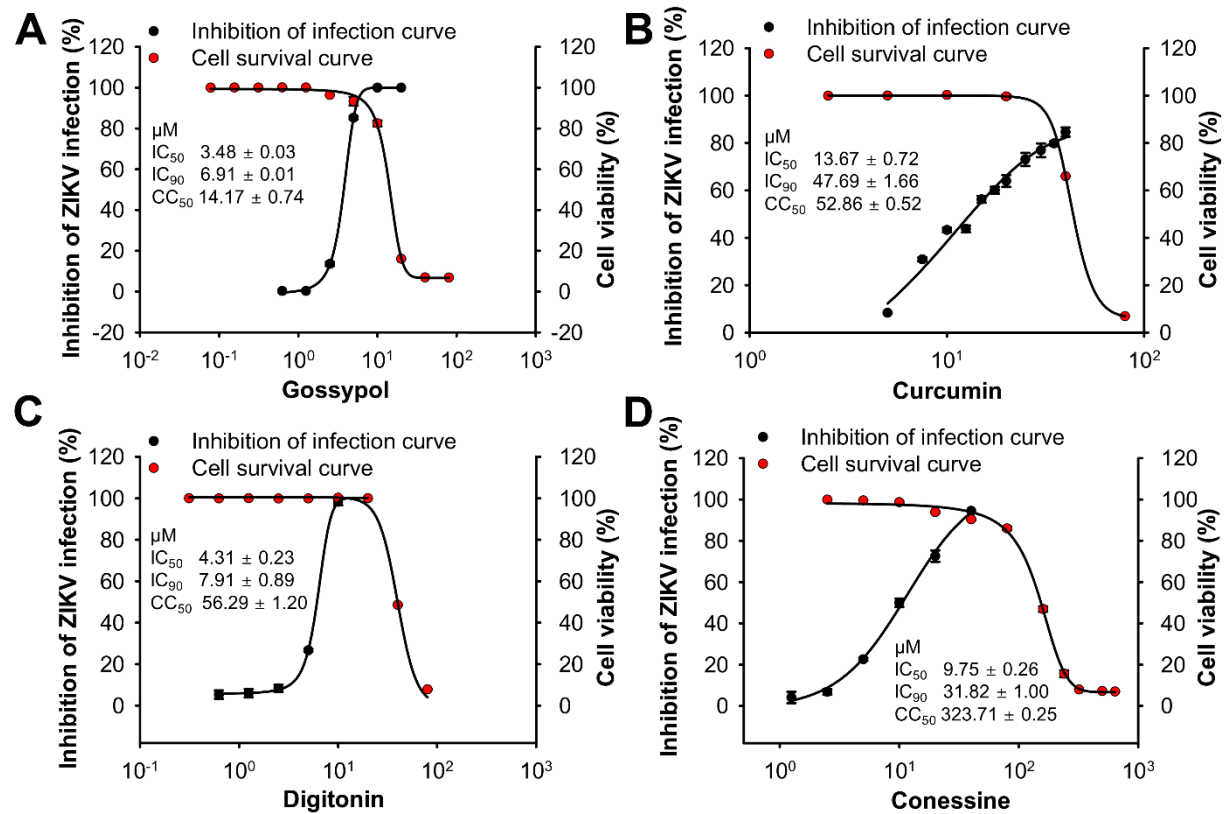

**Figure S1.** Association between inhibitory activity of natural products against ZIKV strain PAN2016 and their cytotoxicity. ZIKV strain PAN2016 (100 PFU) was incubated with each of the natural products at different concentrations at 37°C for 1 h. The compound-virus mixtures were then transferred to Vero E6 cells (10<sup>5</sup>/well) and incubated at 37°C for 1 h. Plates were incubated at 37°C for 4-5 days. Viral titers at each concentration were calculated by plaque assay, which are expressed as percentage inhibition of the untreated virus (black circles). Cell viability was assessed by the Cell Counting Kit-8 (CCK8) assay, and expressed as a percentage relative to that of the untreated cells (red circles). The concentrations of natural products that inhibited 50% (IC<sub>50</sub>) or 90% (IC<sub>90</sub>) of plaque formation, or caused 50% cytotoxicity (CC<sub>50</sub>) in Vero E6 cells are shown in the figure. The data are expressed as the mean ± standard error of the mean (s.e.m.) (n=2). The experiments were repeated twice with similar results.

**Figure S2**

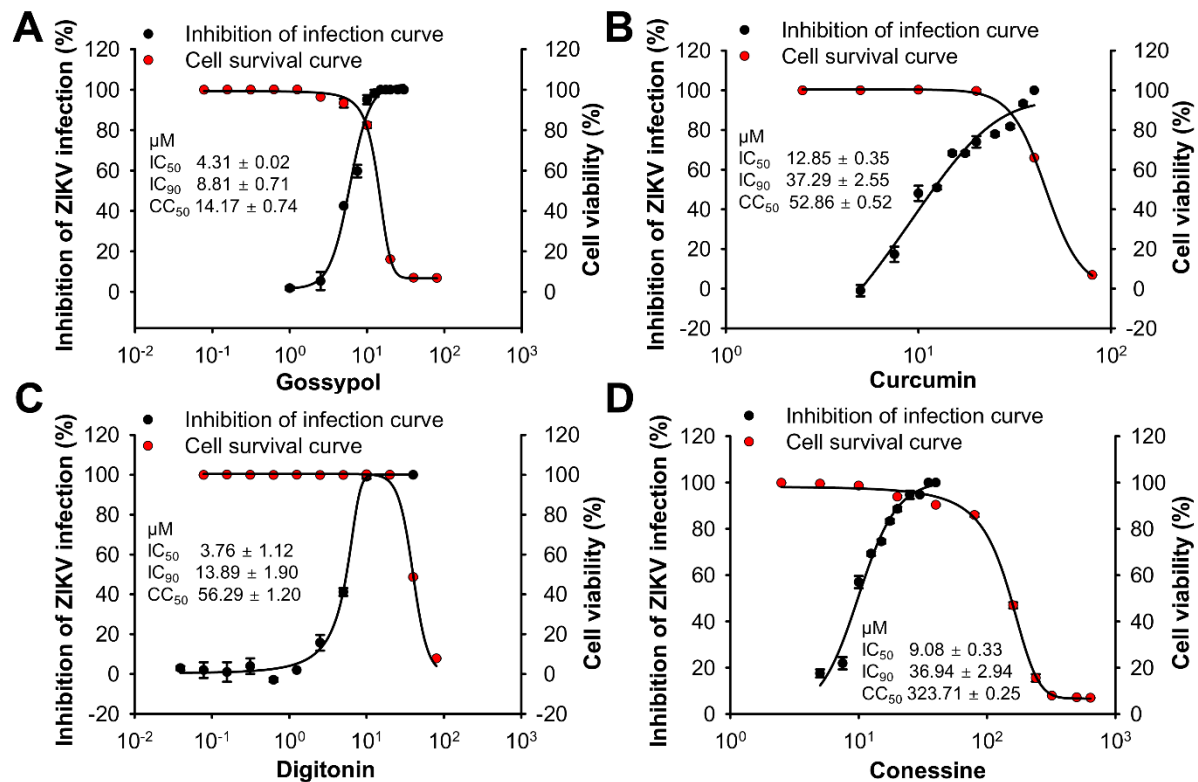

**Figure S2.** Association between inhibitory activity of natural products against ZIKV strain PRVABC59 and their cytotoxicity. ZIKV stain PRVABC59 (100 PFU) was incubated with each of the natural products at different concentrations at 37°C for 1 h. The compound-virus mixtures were then transferred to Vero E6 cells ( $10^5/\text{well}$ ) and incubated at 37°C for 1 h. Plates were further incubated at 37°C for 4-5 days. Viral titers at each concentration were calculated by plaque assay, which are expressed as percentage inhibition of the untreated virus (black circles). Cell viability was assessed by the Cell Counting Kit-8 (CCK8) assay, and expressed as a percentage relative to that of the untreated cells (red circles). The concentrations of natural products that inhibited 50% ( $\text{IC}_{50}$ ) or 90% ( $\text{IC}_{90}$ ) of plaque formation, or caused 50% cytotoxicity ( $\text{CC}_{50}$ ) in Vero E6 cells are shown in the figure. The data are expressed as the mean  $\pm$  standard error of the mean (s.e.m.) ( $n=2$ ). The experiments were repeated twice with similar results.

Figure S3

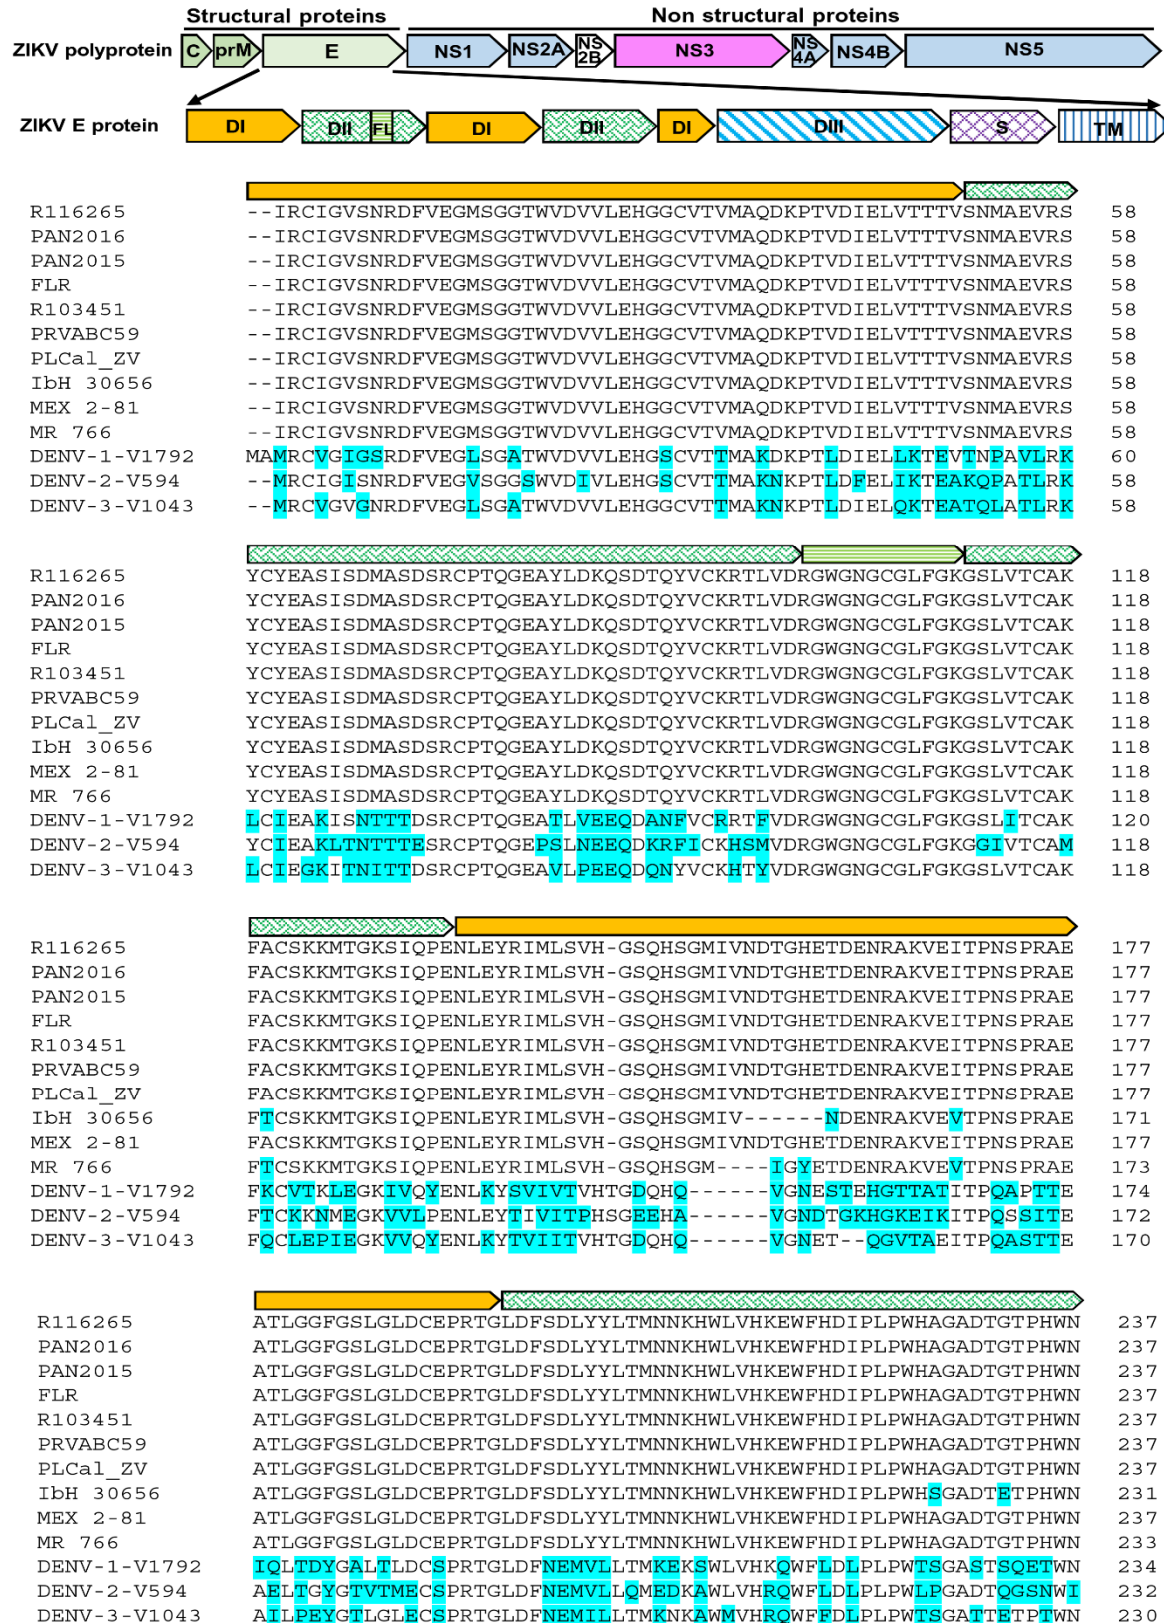

|              |                                                                |     |
|--------------|----------------------------------------------------------------|-----|
| R116265      | NKEALVEFKDAHAKRQTVVVLGSQEGAVHTALAGALEAEMDGAKGRLSSGHLKCRCLKMDK  | 297 |
| PAN2016      | NKEALVEFKDAHAKRQTVVVLGSQEGAVHTALAGALEAEMDGAKGRLSSGHLKCRCLKMDK  | 297 |
| PAN2015      | NKEALVEFKDAHAKRQTVVVLGSQEGAVHTALAGALEAEMDGAKGRLSSGHLKCRCLKMDK  | 297 |
| FLR          | NKEALVEFKDAHAKRQTVVVLGSQEGAVHTALAGALEAEMDGAKGRLSSGHLKCRCLKMDK  | 297 |
| R103451      | NKEALVEFKDAHAKRQTVVVLGSQEGAVHTALAGALEAEMDGAKGRLSSGHLKCRCLKMDK  | 297 |
| PRVABC59     | NKEALVEFKDAHAKRQTVVVLGSQEGAVHTALAGALEAEMDGAKGRLSSGHLKCRCLKMDK  | 297 |
| PLCal_ZV     | NKEALVEFKDAHAKRQTVVVLGSQEGAVHTALAGALEAEMDGAKGRLSSGHLKCRCLKMDK  | 297 |
| IbH 30656    | NKEALVEFKDAHAKRQTVVVLGSQEGAVHTALAGALEAEMDGAKGRLSSGHLKCRCLKMDK  | 291 |
| MEX 2-81     | NKEALVEFKDAHAKRQTVVVLGSQEGAVHTALAGALEAEMDGAKGRLSSGHLKCRCLKMDK  | 297 |
| MR 766       | NKEALVEFKDAHAKRQTVVVLGSQEGAVHTALAGALEAEMDGAKGRLSSGHLKCRCLKMDK  | 293 |
| DENV-1-V1792 | RQDLLVTFKTAHAKRQEVVVLGSQEGAMHTALTGATEIQTSGETT-TIFAGHLKCRCLKMDK | 293 |
| DENV-2-V594  | QKETLVTFKNPHAKKQDVVVLGSQEGAMHTALTGATEIQMSSGN-LLFTGHLKCRCLKMDK  | 291 |
| DENV-3-V1043 | RKELLVTFKNAHAKRQEVVVLGSQEGAMHTALTGATEIQNSGGT-SIFAGHLKCRCLKMDK  | 289 |

|              |                                                                 |     |
|--------------|-----------------------------------------------------------------|-----|
| R116265      | LRLKGVSYSLCTAAFTFTTKI PAETLHGTVTVEVQYAGTDGPCKVPAQMAVDMQTLTPVGR  | 357 |
| PAN2016      | LRLKGVSYSLCTAAFTFTTKI PAETLHGTVTVEVQYAGTDGPCKVPAQMAVDMQTLTPVGR  | 357 |
| PAN2015      | LRLKGVSYSLCTAAFTFTTKI PAETLHGTVTVEVQYAGTDGPCKVPAQMAVDMQTLTPVGR  | 357 |
| FLR          | LRLKGVSYSLCTAAFTFTTKI PAETLHGTVTVEVQYAGTDGPCKVPAQMAVDMQTLTPVGR  | 357 |
| R103451      | LRLKGVSYSLCTAAFTFTTKI PAETLHGTVTVEVQYAGTDGPCKVPAQMAVDMQTLTPVGR  | 357 |
| PRVABC59     | LRLKGVSYSLCTAAFTFTTKI PAETLHGTVTVEVQYAGTDGPCKVPAQMAVDMQTLTPVGR  | 357 |
| PLCal_ZV     | LRLKGVSYSLCTAAFTFTTKI PAETLHGTVTVEVQYAGTDGPCKVPAQMAVDMQTLTPVGR  | 357 |
| IbH 30656    | LRLKGVSYSLCTAAFTFTTKI PAETLHGTVTVEVQYAGTDGPCKVPAQMAVDMQTLTPVGR  | 351 |
| MEX 2-81     | LRLKGVSYSLCTAAFTFTTKI PAETLHGTVTVEVQYAGTDGPCKVPAQMAVDMQTLTPVGR  | 357 |
| MR 766       | LRLKGVSYSLCTAAFTFTTKI PAETLHGTVTVEVQYAGTDGPCKI PVQMAVDMQTLTPVGR | 353 |
| DENV-1-V1792 | LTLKGMYSYVMCTGSSFKLEKEVAETQHGTVLVQIKYEGTDAPCKIPFSTQ-DEKGVTONGR  | 352 |
| DENV-2-V594  | LQLKGMYSYMCCTGKFKIVKEIAETQHGTVLVIRVQYEGDGSCKIPFEIM-DEKRRHVLGR   | 350 |
| DENV-3-V1043 | LELKGMYSYAMCTNTFVLKKEVSETQHGTVLILIKVEYKGEDAPCKIPFSTE-DGQGAHNDR  | 348 |

|              |                                                              |     |
|--------------|--------------------------------------------------------------|-----|
| R116265      | LITANPVITESTENSKMMLELDPPFGDSYIVIGVGEKKITHHWHRSGSTIGKAFEATVRG | 417 |
| PAN2016      | LITANPVITESTENSKMMLELDPPFGDSYIVIGVGEKKITHHWHRSGSTIGKAFEATVRG | 417 |
| PAN2015      | LITANPVITESTENSKMMLELDPPFGDSYIVIGVGEKKITHHWHRSGSTIGKAFEATVRG | 417 |
| FLR          | LITANPVITESTENSKMMLELDPPFGDSYIVIGVGEKKITHHWHRSGSTIGKAFEATVRG | 417 |
| R103451      | LITANPVITESTENSKMMLELDPPFGDSYIVIGVGEKKITHHWHRSGSTIGKAFEATVRG | 417 |
| PRVABC59     | LITANPVITESTENSKMMLELDPPFGDSYIVIGVGEKKITHHWHRSGSTIGKAFEATVRG | 417 |
| PLCal_ZV     | LITANPVITESTENSKMMLELDPPFGDSYIVIGVGEKKITHHWHRSGSTIGKAFEATVRG | 417 |
| IbH 30656    | LITANPVITESTENSKMMLELDPPFGDSYIVIGVGDKKITHHWHRSGSTIGKAFEATVRG | 411 |
| MEX 2-81     | LITANPVITESTENSKMMLELDPPFGDSYIVIGVGEKKITHHWHRSGSTIGKAFEATVRG | 417 |
| MR 766       | LITANPVITESTENSKMMLELDPPFGDSYIVIGVGDKKITHHWHRSGSTIGKAFEATVRG | 413 |
| DENV-1-V1792 | LITANPVTVD--KEKPNVIEAEPPFGESYIVIGAGEKALKLSWFKKSSIGKMFATARG   | 410 |
| DENV-2-V594  | LITVNPVITE--KDSFVNIEAEPPFGDSYIIGVEPGQLKLNWFKKSSIGKMFETTMRG   | 408 |
| DENV-3-V1043 | LITANPVVTK--KEEPVNIEAEPPFGESNIVIGIGNALKINWYKKSSIGKMFATARG    | 406 |

|              |                                                              |     |
|--------------|--------------------------------------------------------------|-----|
| R116265      | AKRMAVLGDTAWDFGSVGGALNSLGKGIHQIFGAAFKSLFGGMSWFSQILIGTLLMWLGL | 477 |
| PAN2016      | AKRMAVLGDTAWDFGSVGGALNSLGKGIHQIFGAAFKSLFGGMSWFSQILIGTLLMWLGL | 477 |
| PAN2015      | AKRMAVLGDTAWDFGSVGGALNSLGKGIHQIFGAAFKSLFGGMSWFSQILIGTLLMWLGL | 477 |
| FLR          | AKRMAVLGDTAWDFGSVGGALNSLGKGIHQIFGAAFKSLFGGMSWFSQILIGTLLMWLGL | 477 |
| R103451      | AKRMAVLGDTAWDFGSVGGALNSLGKGIHQIFGAAFKSLFGGMSWFSQILIGTLLMWLGL | 477 |
| PRVABC59     | AKRMAVLGDTAWDFGSVGGALNSLGKGIHQIFGAAFKSLFGGMSWFSQILIGTLLMWLGL | 477 |
| PLCal_ZV     | AKRMAVLGDTAWDFGSVGGALNSLGKGIHQIFGAAFKSLFGGMSWFSQILIGTLLMWLGL | 477 |
| IbH 30656    | AKRMAVLGDTAWDFGSVGGVNSLGKGIHQIFGAAFKSLFGGMSWFSQILIGTLLVWLGL  | 471 |
| MEX 2-81     | AKRMAVLGDTAWDFGSVGGALNSLGKGIHQIFGAAFKSLFGGMSWFSQILIGTLLMWLGL | 477 |
| MR 766       | AKRMAVLGDTAWDFGSVGGVNSLGKGIHQIFGAAFKSLFGGMSWFSQILIGTLLVWLGL  | 473 |
| DENV-1-V1792 | ARRMAILGDTAWDFGSIGGVFTSVGKLVHQIFGTAYGVLFSGVSWTMKIGIGVLLTWLGL | 470 |
| DENV-2-V594  | AKRMAILGDTAWDFGSLGGVFTSIGKALHQVFGAIYGAAFSGVSWTMKILIGVITWIGM  | 468 |
| DENV-3-V1043 | ARRMAILGDTAWDFGSVGGVLSNLGKMVHQIFGSAYTALFSGVSWVMKIGIGVLLTWIGL | 466 |

|              |                              |     |
|--------------|------------------------------|-----|
| R116265      | NTKNGSISLMCLALGGVLI FLSTAVSA | 504 |
| PAN2016      | NTKNGSISLMCLALGGVLI FLSTAVSA | 504 |
| PAN2015      | NTKNGSISLMCLALGGVLI FLSTAVSA | 504 |
| FLR          | NTKNGSISLMCLALGGVLI FLSTAVSA | 504 |
| R103451      | NTKNGSISLMCLALGGVLI FLSTAVSA | 504 |
| PRVABC59     | NTKNGSISLMCLALGGVLI FLSTAVSA | 504 |
| PLCal_ZV     | NTKNGSISLMCLALGGVLI FLSTAVSA | 504 |
| IbH 30656    | NTKNGSISLTCLALGGVMIFLSTAVSA  | 498 |
| MEX 2-81     | NTKNGSISLMCLALGGVLI FLSTAVSA | 504 |
| MR 766       | NTKNGSISLTCLALGGVMIFLSTAVSA  | 500 |
| DENV-1-V1792 | NSRSTSLSMTCLAVGLVTLYLGVMVQA  | 497 |
| DENV-2-V594  | NSRSTSLSVSLVLVGVTLYLGVMVQA   | 495 |
| DENV-3-V1043 | NSKNTSMSFSCLATGVITLYLGAVVQA  | 493 |

**Figure S3.** Multiple sequence alignment of amino acid (aa) sequences of E protein of 10 ZIKV strains and DENV-1-3 human strains used in this study. Schematic maps of ZIKV polyprotein and ZIKV E protein are listed on top of the alignment. Amino acids variable positions are highlighted. The sequence of DENV-4-PR 06-65-740 is not available, so its sequence alignment is not included. The alignment was performed using Clustal V method of MegAlign (v7.1) within the DNASTAR package. C: capsid; prM: precursor of membrane; E: envelope; NS1, NS2A, NS2B, NS3, NS4A, NS4B, and NS5: nonstructural proteins. DI-DIII: domain I-III of E protein; FL: fusion loop; S: stalk region; TM: transmembrane domain.
